# Supplementary material
Source: publisher site journal article supplement (https://www.dovepress.com/article/452643)
Supplement: Supplementary file 1 [file get_supplementary_file.php]

Supplementary tables:

Table S1. Demographic and clinical characteristics of female MDD patients.

|  | MDD/NSSI(n=128)  N (%)  Median (IQR)  Mean ± SD | MDD/non-NSSI(n=113)  N (%)  Median (IQR)  Mean ± SD | Statistic | P |
| --- | --- | --- | --- | --- |
| Age | 16(14-16) | 15 (15-16.25) | z=-0917 | 0.359a |
| BMI | 20.06(18.40-21.60) | 20.30 (18.73-22.83) | z=-0.623 | 0.533a |
| Smoking | 8 (6.25) | 2 (1.77) | χ²=3.029 | 0.082b |
| Family history of mental illness | 15 (11.72) | 14 (12.5) | χ²=0.034 | 0.853b |
| Age of onset | 14 (12-15) | 13(12-15) | z=-0.884 | 0.377a |
| Duration of illness (months) | 12 (7-24) | 12 (6-24.25) | z=-0.698 | 0.485a |
| Antidepressant use | 91 (71.09) | 53 (47.32) | χ²=14.065 | < 0.001b |
| PHQ-9(scores) | 21 (18-24) | 18 (14.75-22) | z=-4.777 | < 0.001a |
| GAD-7(scores) | 16 (13-19) | 13.5 (9-18) | z=-2.761 | 0.006a |
| Tbil(μM) | 8.26 (6.16-10.38) | 9.08 (6.08-10.78) | z=-1.182 | 0.237a |
| UA(μM) | 297.18±65.32 | 316.93±71.33 | t=-2.243 | 0.026c |
| FT3 (p M) | 4.69(4.11-5.11) | 4.78 (4.33-5.25) | z=-1.344 | 0.179a |
| FT4 (p M) | 14.78±2.43 | 15.02±2.13 | t=-0.784 | 0.434c |
| TSH (μ IU/mL) | 1.79(1.22-2.72) | 1.76 (1.18-2.66) | z=-0.312 | 0.755a |

Notes:

a Median (interquartile range). Mann-whitney Test

b Number (percentage). Level of significance of the chi-squared test

C Mean ± s.d. Two independent samples t-test

MDD/non-NSSI=Major depressive disorder without non-suicidal self-injury group. Abbreviations:

MDD/NSSI=Major depressive disorder with non-suicidal self-injury. IQR=inter quartile range; BMI: body mass index; PHQ-9: 9-item Patient Health Questionnaire; GAD-7：7-item Generalized Anxiety Disorder scale; Tbil=total bilirubin; UA=uric acid; FT3= free triiodothyronine; FT4=free thyroxine; TSH= thyroid-stimulating hormone.

Table S2. Demographic and clinical characteristics of male MDD patients.

|  | MDD/NSSI(n=30)  N (%)  Median (IQR)  Mean ± SD | MDD/non-NSSI(n=45)  N (%)  Median (IQR)  Mean ± SD | Statistic | P |
| --- | --- | --- | --- | --- |
| Age | 16 (15-17) | 15 (14-16) | z=-1.189 | 0.235a |
| BMI | 21.20 (18.34-23.24) | 20.24 (18.71-22.49) | z=-0.087 | 0.931a |
| Smoking | 4 (13.33) | 5 (11.11) | χ²=0.084 | 0.772b |
| Family history of mental illness | 4 (13.33) | 3 (6.67) | χ²=0.945 | 0.331b |
| Age of onset | 14 (13-15) | 14 (13-15) | z=-0.766 | 0.443a |
| Duration of illness (months) | 12 (6-24) | 12 (6-24) | z=-0.425 | 0.671a |
| Antidepressant use | 17 (56.67) | 16 (35.56) | χ²=3.256 | 0.071b |
| PHQ-9(scores) | 18.00 (15.00-23.00) | 17.00 (13.00-21.00) | z=-1.296 | 0.195a |
| GAD-7(scores) | 12.97±4.64 | 13.42±4.67 | t=-0.415 | 0.679c |
| Tbil(μM) | 11.02(7.69-16.97) | 12.35 (10.25-17.74) | z=-0.660 | 0.509a |
| UA(μM) | 420.07±70.97 | 412.61±97.27 | t=0.361 | 0.719c |
| FT3 (p M) | 5.26±0.57 | 5.30±0.74 | t=-0.266 | 0.791c |
| FT4 (p M) | 16.03±2.43 | 16.43±2.37 | t=-0.648 | 0.519c |
| TSH (μ IU/mL) | 1.75 (1.42-2.41) | 2.44 (1.76-2.97) | z=-2.345 | 0.019a |

Notes:

a Median (interquartile range). Mann-whitney Test

b Number (percentage). Level of significance of the chi-squared test

C Mean ± s.d. Two independent samples t-test

Abbreviations:

MDD/non-NSSI=Major depressive disorder without non-suicidal self-injury group. MDD/NSSI=Major depressive disorder with non-suicidal self-injury. IQR=inter quartile range; BMI: body mass index; PHQ-9: 9-item Patient Health Questionnaire; GAD-7：7-item Generalized Anxiety Disorder scale; Tbil=total bilirubin; UA=uric acid; FT3= free triiodothyronine; FT4=free thyroxine; TSH= thyroid-stimulating hormone.

Table S3. Spearman correlation coefficients between TSH, FT4 and FT3 levels and total bilirubin, uric acid in depressive patients.

|  |  | FT3 | | FT4 | | TSH | |
| --- | --- | --- | --- | --- | --- | --- | --- |
|  |  | r | P | r | P | r | P |
| MDD/non-NSSI | Tbil | 0.097 | 0.251 | 0.341 | ＜0.001 | 0.039 | 0.414 |
| UA | 0.098 | 0.246 | 0.142 | 0.091 | 0.074 | 0.381 |
| MDD/NSSI | Tbil | 0.157 | 0.070 | 0.366 | ＜0.001 | -0.151 | 0.081 |
| UA | 0.208 | 0.016 | 0.181 | 0.036 | -0.001 | 0.988 |
| MDD/non-NSSI+MDD/NSSI | Tbil | 0.127 | 0.034 | 0.364. | ＜0.001 | -0.028 | 0.639 |
| UA | 0.155 | 0.010 | 0.170 | 0.005 | 0.042 | 0.483 |

Abbreviations:

MDD/non-NSSI=Major depressive disorder without non-suicidal self-injury group. MDD/NSSI=Major depressive disorder with non-suicidal self-injury. Tbil=total bilirubin; UA=uric acid; FT3= free triiodothyronine; FT4=free thyroxine; TSH= thyroid-stimulating hormone.

Table S4. Binary logistic regression of related factors of NSSI in MDD patients.

| Factor | Ba | Walda | ORa | 95%CIa | P | Bb | Waldb | ORb | 95%CIb | P |
| --- | --- | --- | --- | --- | --- | --- | --- | --- | --- | --- |
| Tbil | -0.029 | 2.000 | 0.971 | 0.932-1.011 | 0.157 | 0.000 | 0.000 | 1.000 | 0.956-1.047 | 0.985 |
| UA | -0.003 | 5.729 | 0.997 | 0.994-0.999 | 0.017 | -0.003 | 3.423 | 0.997 | 0.994-1.000 | 0.064 |
| FT3 | -0.257 | 2.452 | 0.773 | 0.561-1.067 | 0.117 | -0.081 | 0.189 | 0.922 | 0.638-1.331 | 0.664 |
| FT4 | -0.064 | 1.549 | 0.213 | 0.849-1.037 | 0.213 | -0.002 | 0.001 | 0.998 | 0.890-1.119 | 0.970 |
| TSH | -0.121 | 1.576 | 0.886 | 0.733-1.070 | 0.209 | -0.117 | 1.246 | 0.890 | 0.724-1.093 | 0.264 |

Notes:

a Uncorrected.

bCorrected the difference factors, including: gender, antidepressant use, PHQ-9 and GAD-7.

Abbreviations:

Tbil=total bilirubin; UA=uric acid; FT3= free triiodothyronine; FT4=free thyroxine; TSH= thyroid-stimulating hormone.

Supplementary figures:

Figure S1:Incidence rate of NSSI in female and male.

Figure S2: Comparison of the levels of several antioxidant factor and thyroid function between group MDD/NSSI and group MDD/non-NSSI in female MDD patients.(A) The levels of Tbil did not significantly differ with statistical significance within the MDD/NSSI and the MDD/non-NSSI group (P=0.237). (B)The levels of UA in MDD/NSSI were significantly decreased when compared with MDD/non-NSSI (P=0.026) . (C-E) The levels of FT3 (P=0.179), FT4 (P=0.434)and TSH (P=0.755) did not significantly differ with statistical significance within the MDD/NSSI and the MDD/non-NSSI group.

Figure S3: Comparison of the levels of several antioxidant factor and thyroid function between group MDD/NSSI and group MDD in male MDD patients.(A-D)The levels of Tbil (P=0.509), UA (P=0.719), FT3 (P=0.791) and FT4 (P=0.519)did not significantly differ with statistical significance within the MDD/NSSI and the MDD/non-NSSI group. (E)The levels of TSH in MDD/NSSI were significantly decreased when compared with MDD/non-NSSI(P*=*0.019).

Figure S1

Incidence rate of NSSI in female and male.

**
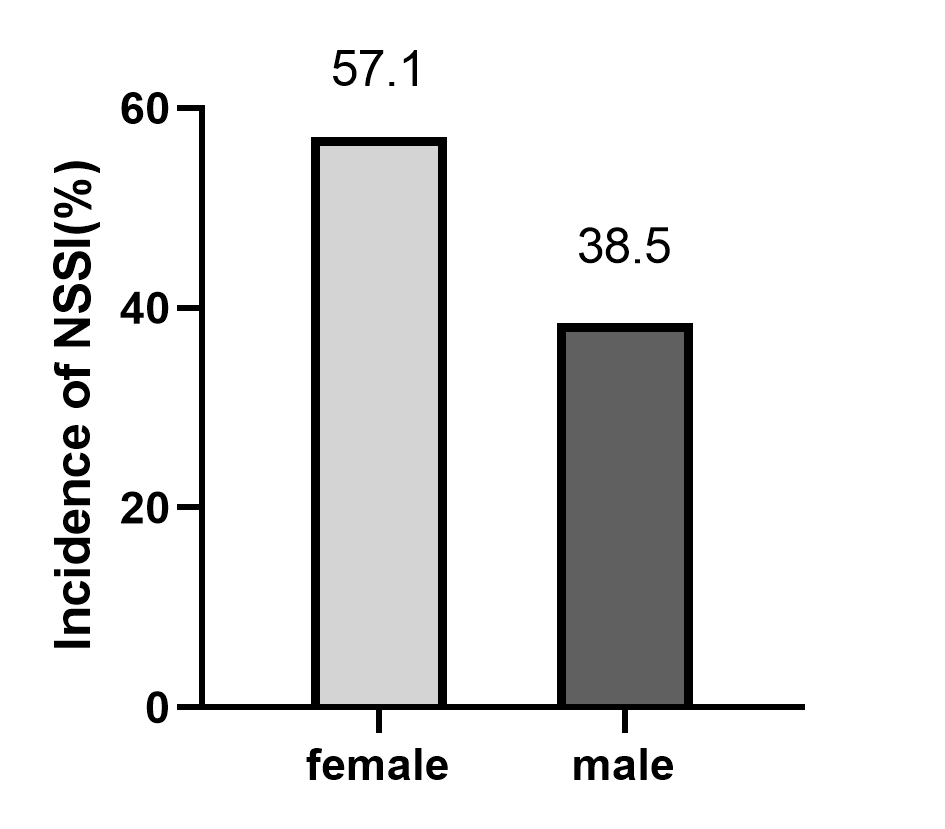
**

Figure S2. Comparison of the levels of several antioxidant factor and thyroid function between group MDD/NSSI and group MDD/non-NSSI in female MDD patients..(A) The levels of Tbil did not significantly differ with statistical significance within the MDD/NSSI and the MDD/non-NSSI group (P=0.237). (B)The levels of UA in MDD/NSSI were significantly decreased when compared with MDD/non-NSSI (P=0.026) . (C-E) The levels of FT3 (P=0.179), FT4 (P=0.434)and TSH (P=0.755) did not significantly differ with statistical significance within the MDD/NSSI and the MDD/non-NSSI group.


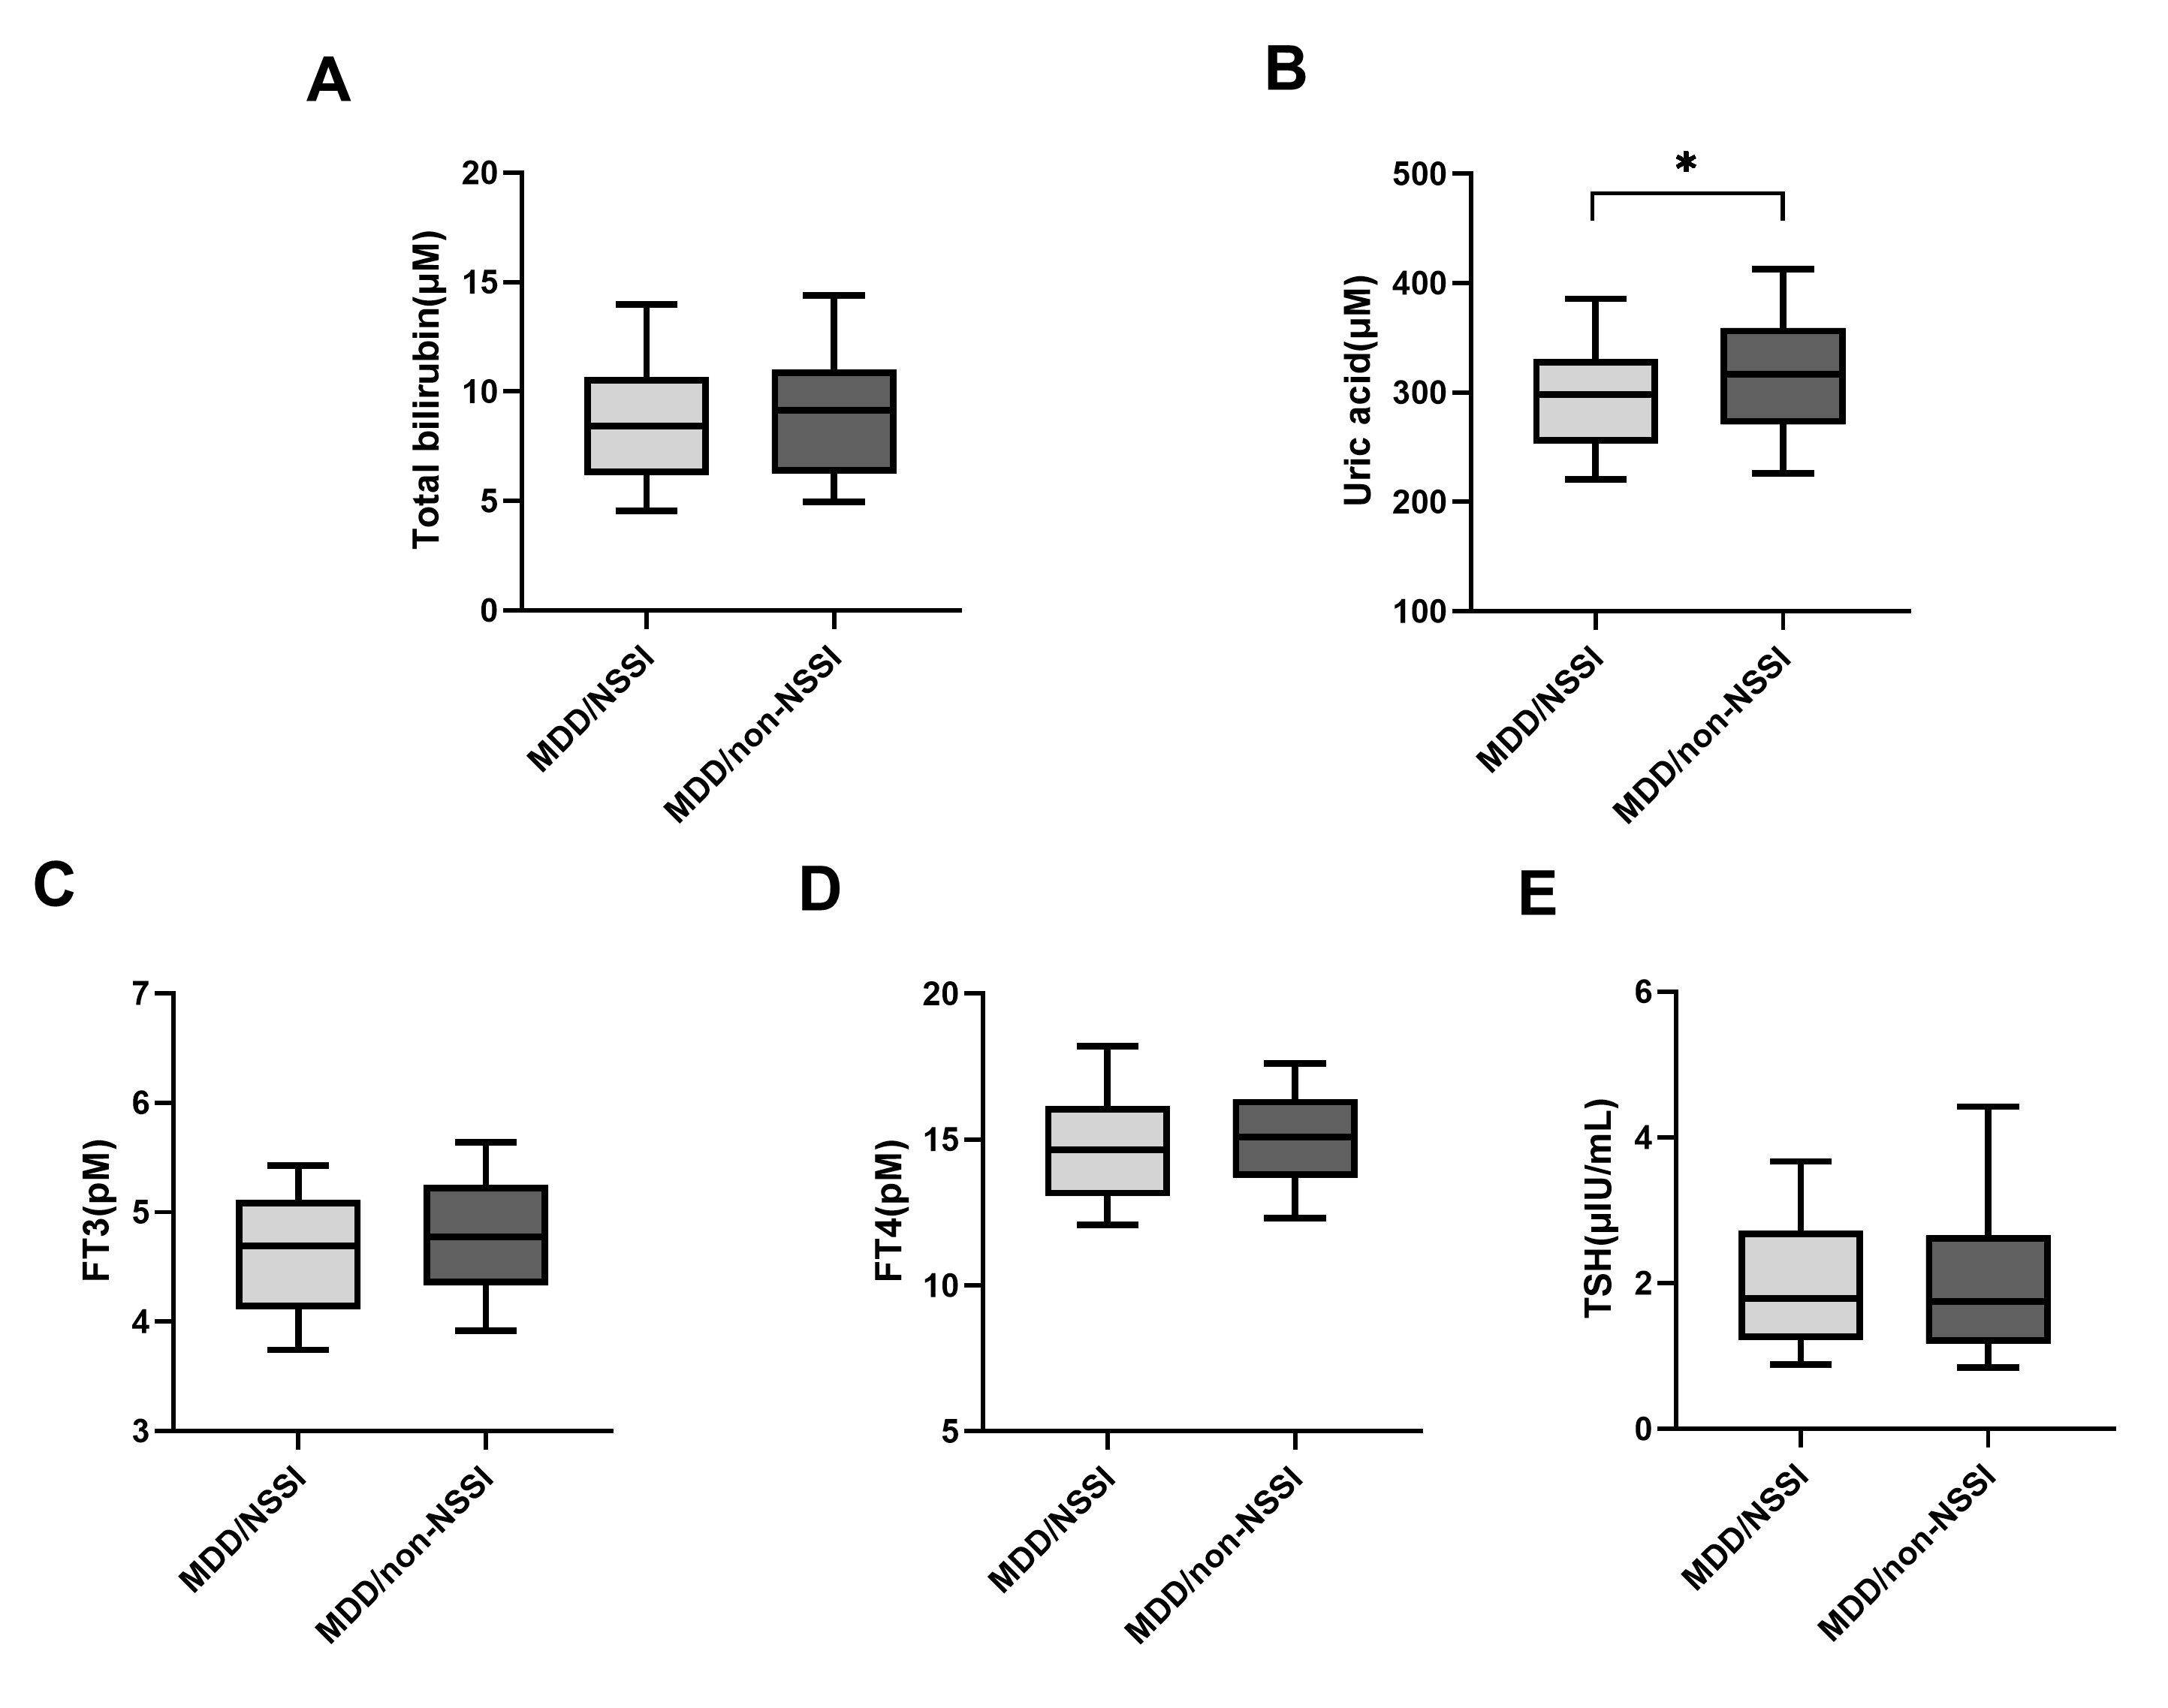


MDD/non-NSSI=Major depressive disorder without non-suicidal self-injury group. MDD/NSSI=Major depressive disorder with non-suicidal self-injury. Tbil=total bilirubin; UA=uric acid; FT3= free triiodothyronine; FT4=free thyroxine; TSH= thyroid-stimulating hormone.

* P<0.05

Figure S3. Comparison of the levels of several antioxidant factor and thyroid function between group MDD/NSSI and group MDD in male MDD patients.(A-D)The levels of Tbil (P=0.509), UA (P=0.719), FT3 (P=0.791) and FT4 (P=0.519)did not significantly differ with statistical significance within the MDD/NSSI and the MDD/non-NSSI group. (E)The levels of TSH in MDD/NSSI were significantly decreased when compared with MDD/non-NSSI(P*=*0.019).


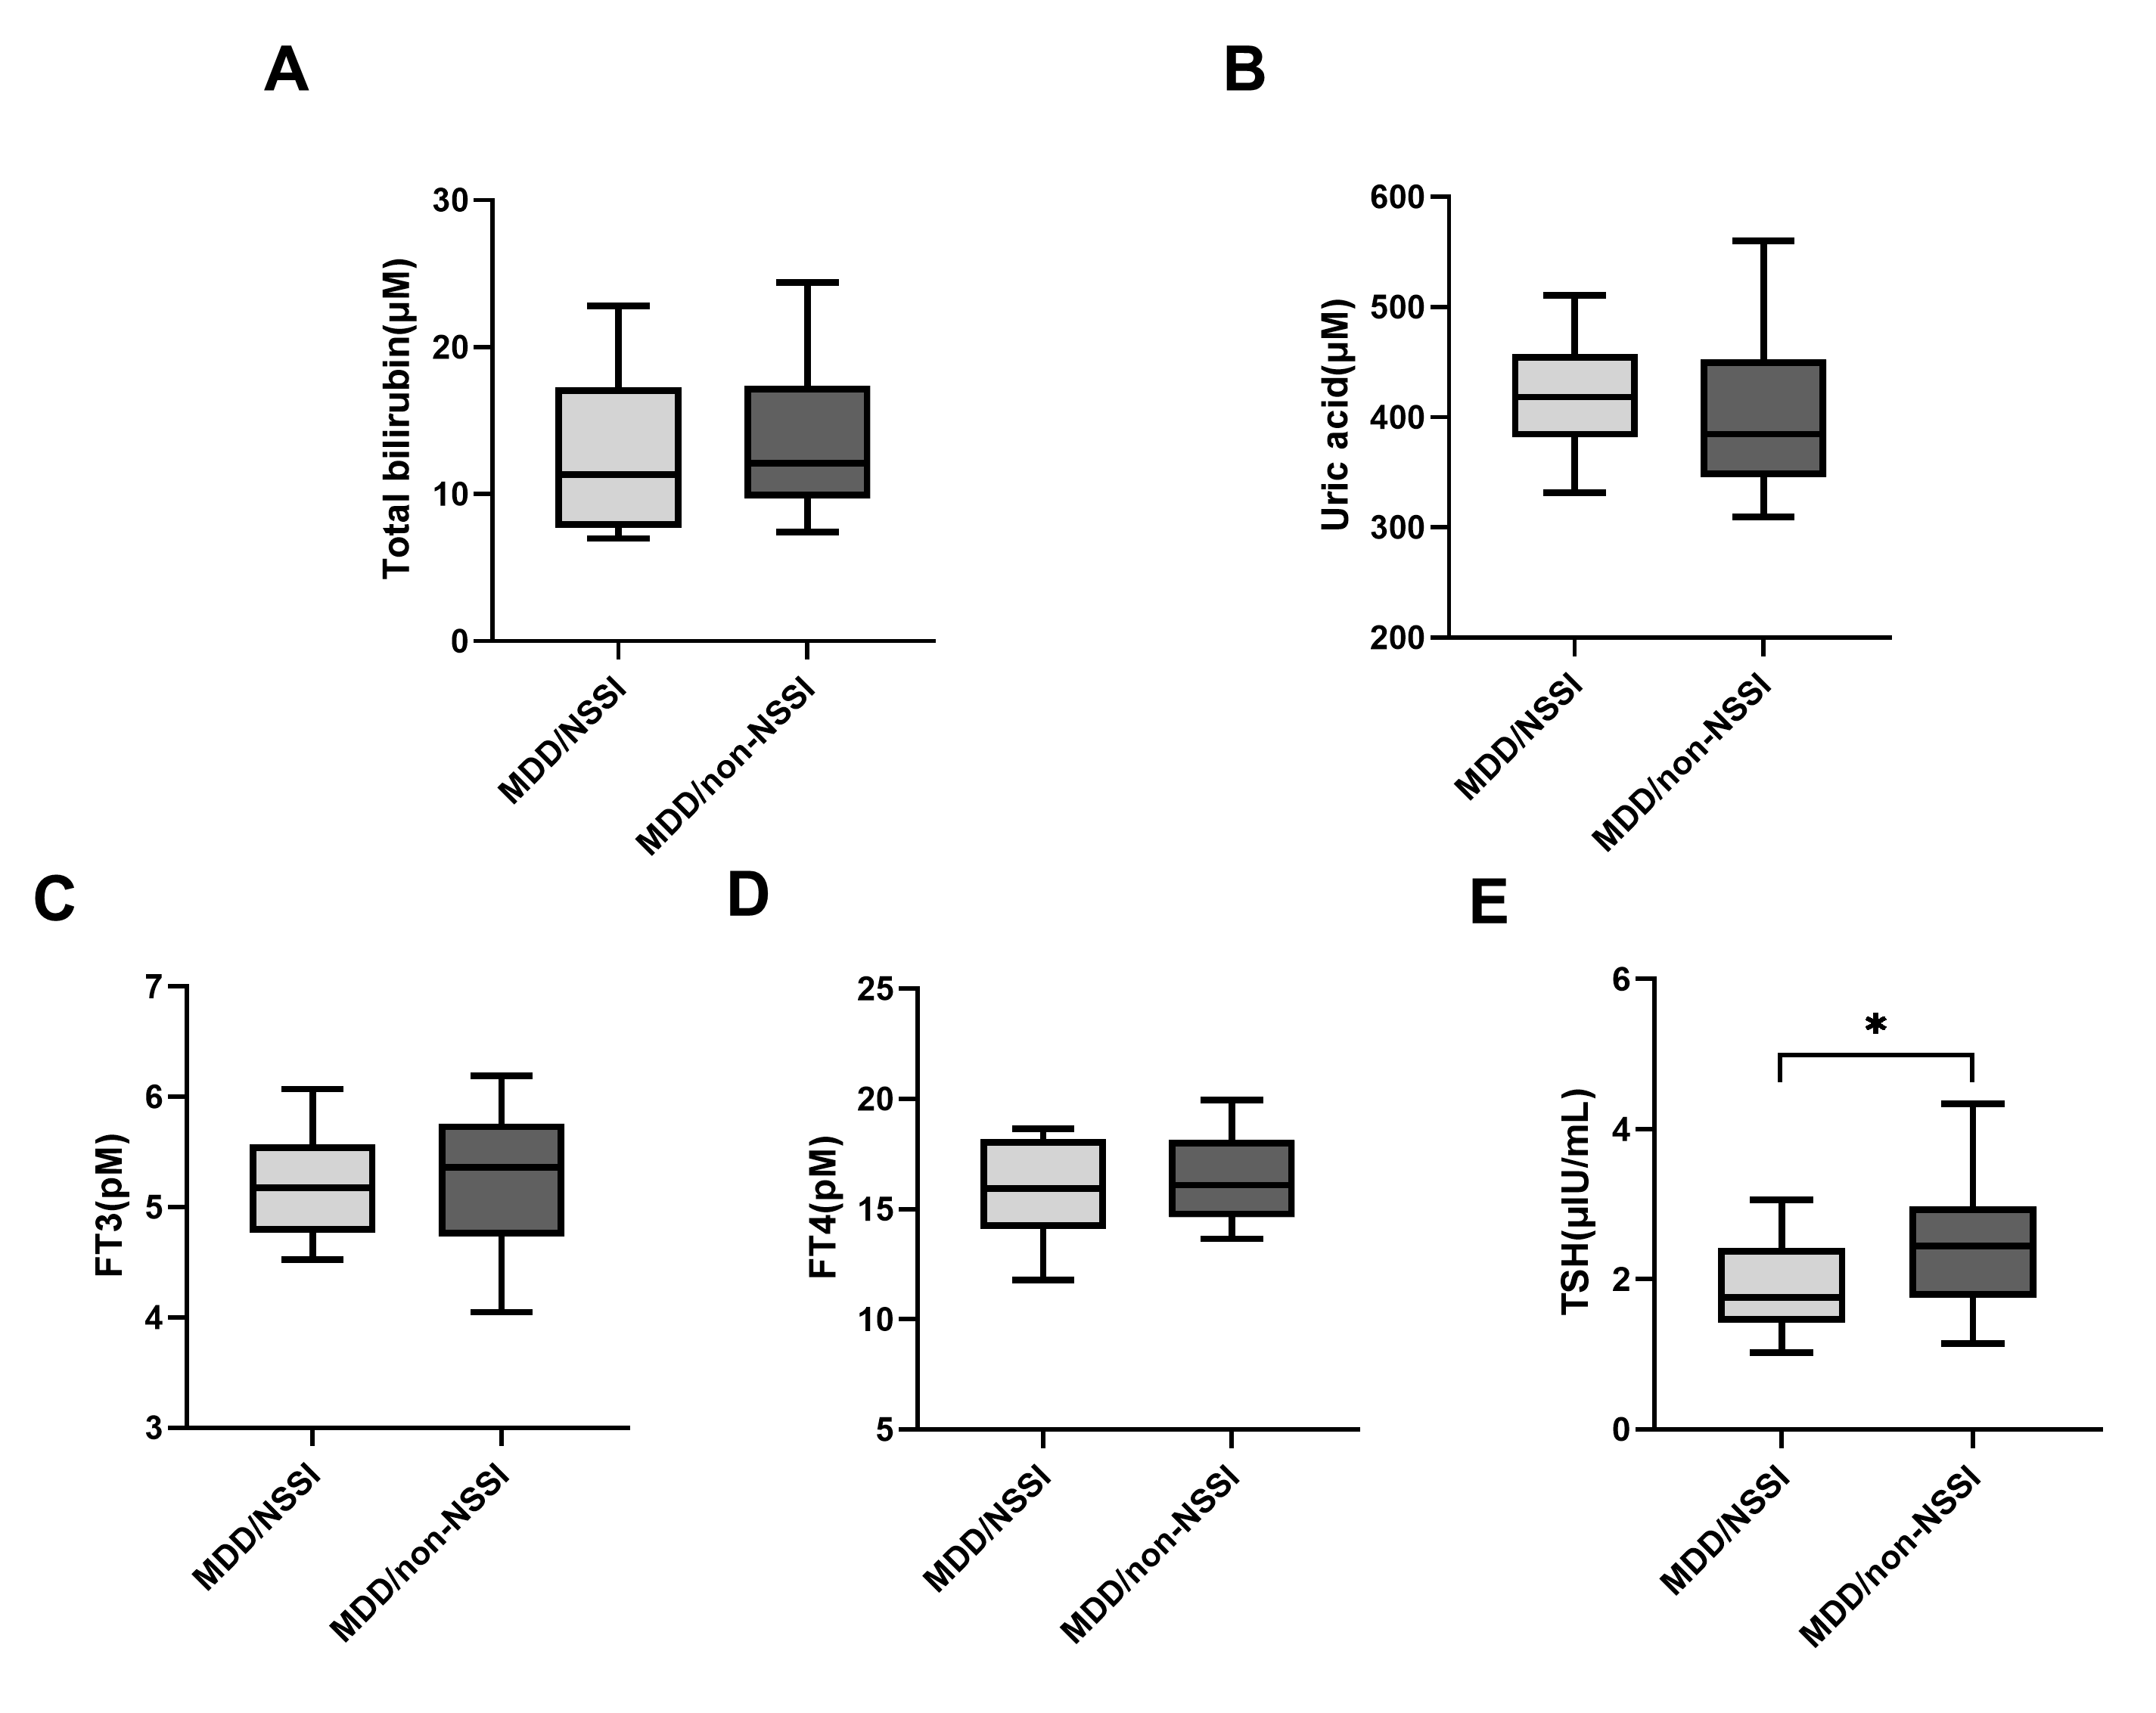


MDD/non-NSSI=Major depressive disorder without non-suicidal self-injury group. MDD/NSSI=Major depressive disorder with non-suicidal self-injury. Tbil=total bilirubin; UA=uric acid; FT3= free triiodothyronine; FT4=free thyroxine; TSH= thyroid-stimulating hormone.

* P<0.05
